# Supplementary material for: A Novel Aquaporin 12-like Protein from Chilo suppressalis: Characterization and Functional Analysis
Source: MDPI journal article supplement (doi:10.3390/genes10040311), 2019-04-21
Supplement: s1 [file s1]

**Figure S1.** The complete cDNA sequence and predicted amino acid sequence of *CsAQP12L\_V1* of *Chilo suppressalis*

```

1      ATGGGGGCACCGATCGCCGCACAATAAAACCAACGTAGTACCTATTATATTTTCTACGAATTCGACTTTCCTGTGGTCACTT
91     GAGAAAGTGTACGGGAAAAGGTACCTAAAGTGTCTAAAATTGGGTGTTGCAGTTCTAAATGTACCTATGTGAAGTGATAAGGAAGT
181    GAATTTTGAAATTGGAAGGTAAATTAGACTGACGTCAATTGAAGTTCACAATCGATGTATTGGGGATTTTCTTGAAAGTTGTCATTAGG
1      M K F T I D V L G I F L K V V I R
271    GTAAACAAAGTTACGTTTGACACCATAGTGGTATCAGCGCTGTTCACTCCTCACGTCTCTCTGGCCCACTGCGCGCGCGCCTGGTG
18     V N K V T F A P L V V S A L F I L L T S L L A H C A R R L V
361    CAGAAGGCAGTGCAGGAGCCTTTTCGTAGATTACTGTTGGAGGAGGCGATCGCAGCTGCCGAATATGCGGATGTTGCTTCGAACCTATT
48     Q K A V Q E P F V R L L L E E A I A A A E L C G C C F E L I
451    ATTGTGGCTGACAACTTCGGGGTGGGAACGTACGCCATATCCTGTTCTTGCTGACAATCTGGTGGTCCATGAACTGGGGTGATGCGACA
78     I V A D N F G V G T Y A I F L F L L T I W W S M N W G D A T
541    GCTTGTCGTACACTCATATCGAGGATGTGATTGAAGGCAAGGTGATGTTGAAAAGCTTGTCTAAAACTTGGGCGGAATTGACTGGC
108    A C P Y T H I E D V I E G K G D V R K A L L K T W A E L T G
631    GGTCTTCTGGTATTTAAATACGTCCAAATGTATTGGGCTCTTGAAATATCTGAGACGCATAAAGATAAGGCTTTTGAAGACTGCAAAGCC
138    G L L V F K Y V Q M Y W A L E I S E T H K D K A F E D C K A
721    GATCTACAGGTACCAGTATTATATGGAGCAGTCGTAGAAGGTGTAGCAACCTGCCTATGTAGACTAGCCTCCAAAGCTTTAGGGGACTTG
168    D L Q V P V L Y G A V V E G V A T C L C R L A S K A L G D L
811    AATCCTCGGTTCTCAACCGCTATCGATGCCTTCATCGGACTTCTTTAGTCGTCGCCGCTTTTGAATATTCGGTGGATATTTCAACCGG
198    N P R F S T A I D A F I G T S L V V A A F E Y S G G Y F N P
901    GTTCTGGCCACCTCACTGAAAGCAGGATGCGAAGGTCACTCGCTGTTGGAACACGCAGTTGTCTATTGGATCGGTGCTTCGCGTGGATCT
228    V L A T S L K A G C E G H S L L E H A V V Y W I G A C A G S
991    GCATTATCAGTTTATATGTACAACTACCCATCATCAAGAAGTTTGCCGTGGCACTACAGAAGTCAACGGTGATAGTATTGGGGCGAC
258    A L S V Y M Y K L P I I K K F V R G T T E V N G D S I W A D
1081   AAAGAAGATTAAGTATCATTTCCTGTTTTGTACATTTCCAAGTCATATCCAGTTTCTTTCTGTCTTCTGTGTGTCATTA
288    K E D *
1171   TTTAAGTTAACTTCATTATCTCTTTTATAAACTAAGAAGACTTAAGAAGACGTTATCTGATAATTAATTATTAAGTGATACCTTAC
1261   TCTAGTCAAGTTATATCTCTAAGTTAAACCTCGTGCTTTGTCCATTATACAGATTTTACAAGTTATTGTATTAAAGGAAACAAAAATAC
1351   GCAAACCTTTTATATGAAATTTTTTACTTATATTTTTTATAATTTATTGTAAATTCGCCTTGATGTCAACACAATTGAATATTGACG
1441   TTTTGAAGTGTGAATAATTGATTTCGTTTAAGGTTTGATTGTATAGCGTCATTTGTTACTATGCTTCCATTGAAATCTAACCTAAATGTG
1531   TTCCAAAAATATAATAAGTGCTACGTGAACCTGTTGTAATAAATCCAATGTTTTGTTAAAAA

```

**Figure S2.** The complete cDNA sequence and predicted amino acid sequence of *CsAQP12L\_V2* of *Chilo suppressalis*

```

1      AAGCAGTGGTATCAACGCAGGTACATGGGGTAGTACCTATTATATTTTCTACGAATTCGACTTTCCTGTGGTCACTTGAGAAAGTG
91     TCACGGGAAAAGGTACCTAAAGTGTCTAAAATTCGGGTGTTGCAGTTCTAAAATGTACCTATGTGAAGTGATAAGGAAGTGAATTTGA
181    AATTGGAAGTAAATTAGACTGACGTCATTATGAAGTTCACAATCGATGATTGGGGATTTTCTTGAAAGTTGTCATTAGGGTAAACAAA
1      M K F T I D V L G I F L K V V I R V N K
271    GTTACGTTTGACCATTAGTGGTATCAGCGCTGTTCTACTCTCCTGCGCCACTGCGCGCGCGCCTGGTGCAGAAGGCA
21     V T F A P L V V S A L F I L L T S L L A H C A R R L V Q K A
361    GTGCAGGAGCCTTTTCGTCAGATTACTGTTGGAGGAGCGATCGCAGCTGCCAACTATGCGGATGTTGCTTCAACTCATTATTGTGGCT
51     V Q E P F V R L L L E E A I A A A E L C G C C F E L I I V A
451    GACAACTTCGGGTGGGAACGTACCCATATTCCTGTTCTTGCTGACAATCTGGTGGTCCATGAACTGGGGTGATGCGACAGCTTGTCGG
81     D N F G V G T Y A I F L F L L T I W W S M N W G D A T A C P
541    TACTACTCATATCGAGGATGTGATTGAAGGCAAGGTGATGTTGAAAAGCTTTGCTAAAACTTGGGCGGAATTGACTGGCGGTCTTCTG
111    Y T H I E D V I E G K G D V R K A L L K T W A E L T G G L L
631    GTATTTAAATACGTCCAAATGTATTGGGCTCTTGAATATCTGAGACGCATAAGATAAGGCTTTGAAGACTGCAAAAGCCGATCTACAG
141    V F K Y V Q M Y W A L E I S E T H K D K A F E D C K A D L Q
721    GTACCAGTATTATATGGAGCAGTCGTAGAAGGTGTAGCAACCTGCCTATGTAGACTAGCCTCAAAGCTTTAGGGGACTTGAATCCTCGG
171    V P V L Y G A V V E G V A T C L C R L A S K A L G D L N P R
811    TTCTCAACCGCTATCGATGCCTTCATCGGGACTTCTTAGTCGTCGCCGAGTCTCACTAGGCACACGGTTTCGTCACCGGTATCAG
201    F S T A I D A F I G T S L V V A G V L T R H T V F V Y R Y Q
901    GACAATAGTGCCAATGCGGACTTAAGCGTGTCCATCTTTTGCAAAGTACATTAGGAAAGCTTTTGAATATTCGGTGGATATTCAAC
231    D N S A N A D L S V S I F C K V H L G K A F E Y S G G Y F N
991    CCGGTTCTGGCCACTCACTGAAAGCAGGATGCGAAGGTCACTCGCTGTTGGAACACGAGTTGTCTATTGGATCGGTGCTGCGCTGGA
261    P V L A T S L K A G C E G H S L L E H A V V Y W I G A C A G
1081   TCTGCATTATCAGTTTATATGTACAACTACCCATCATCAAGAAGTTTGTCCGTGGCACTACAGAAGTCAACGGTGATAGTATTGGGGG
291    S A L S V Y M Y K L P I I K K F V R G T T E V N G D S I W A
1171   GACAAAGAAGATTAAGTATCATTTCCTGTTTTTTGTACATTTTCCAAGTCATATCCAGTTTCTTTCTTGCTTCTTCTGTTGTTT
321    D K E D *
1261   ATTATTTAAGTTAACTTCATTATCTCTTTATAAACTAAGAAGACTTAAGAAGAAGTTATCTGATAATTAATTTATTAAGTGATACC
1351   TTA CTCTAGTCAAGTTATATCTCTAAGTTAAACCTCGTCTTTGTCCATTATACAGATTTTACAAGTTATTGTATTAAAGGAACAAAAA
1441   ATACGCAAACTTTTATATGAAATTTTTTACTTATATTTTTTATAATTTATTGTAATTCGCCTTGATATCATCACACAATGAATATT
1531   GATGTTTTGAAGTGTGAATAATTGATTCGTTTAAGGTTTGATTGTATAGCGTCATTTGTTACTATGCTTCCATTGAAATCTAACCTAAA
1621   TGTGTTCCAAAAATATAATAAGTGCTACGTGAACCTGTTGTAATAAATCCAATGTTTTGTTAGTCAAAAAAAAAA

```
